# Supplementary material for: CD36 identified by weighted gene co-expression network analysis as a hub candidate gene in lupus nephritis
Source: PeerJ. 2019 Oct 1;7:e7722. doi: 10.7717/peerj.7722 (PMC6777479; doi:10.7717/peerj.7722)
Supplement: Table S1 [file peerj-07-7722-s001.xlsx]

## Sheet: Sheet1
The information of samples from GEO dataset
GEO ID	Sample ID	Type	Tissue	Source
GSE104948	GSM2810793	Normal	Glomeruli	living transplant donors
	GSM2810794	Normal	Glomeruli	living transplant donors
	GSM2810795	Normal	Glomeruli	living transplant donors
	GSM2810796	Normal	Glomeruli	living transplant donors
	GSM2810797	Normal	Glomeruli	living transplant donors
	GSM2810798	Normal	Glomeruli	living transplant donors
	GSM2810799	Normal	Glomeruli	living transplant donors
	GSM2810800	Normal	Glomeruli	living transplant donors
	GSM2810801	Normal	Glomeruli	living transplant donors
	GSM2810802	Normal	Glomeruli	living transplant donors
	GSM2810803	Normal	Glomeruli	living transplant donors
	GSM2810804	Normal	Glomeruli	living transplant donors
	GSM2810805	Normal	Glomeruli	living transplant donors
	GSM2810806	Normal	Glomeruli	living transplant donors
	GSM2810807	Normal	Glomeruli	living transplant donors
	GSM2810808	Normal	Glomeruli	living transplant donors
	GSM2810809	Normal	Glomeruli	living transplant donors
	GSM2810810	Normal	Glomeruli	living transplant donors
	GSM2810738	LN	Glomeruli	SLE patient
	GSM2810739	LN	Glomeruli	SLE patient
	GSM2810741	LN	Glomeruli	SLE patient
	GSM2810743	LN	Glomeruli	SLE patient
	GSM2810745	LN	Glomeruli	SLE patient
	GSM2810746	LN	Glomeruli	SLE patient
	GSM2810747	LN	Glomeruli	SLE patient
	GSM2810748	LN	Glomeruli	SLE patient
	GSM2810749	LN	Glomeruli	SLE patient
	GSM2810750	LN	Glomeruli	SLE patient
	GSM2810751	LN	Glomeruli	SLE patient
	GSM2810752	LN	Glomeruli	SLE patient
	GSM2810758	LN	Glomeruli	SLE patient
	GSM2810761	LN	Glomeruli	SLE patient
	GSM2810762	LN	Glomeruli	SLE patient
	GSM2810763	LN	Glomeruli	SLE patient
	GSM2810764	LN	Glomeruli	SLE patient
	GSM2810765	LN	Glomeruli	SLE patient
	GSM2810767	LN	Glomeruli	SLE patient
	GSM2810768	LN	Glomeruli	SLE patient
	GSM2810769	LN	Glomeruli	SLE patient
GSE113342	GSM3103994	Normal	Glomeruli	living transplant donors
	GSM3103995	Normal	Glomeruli	living transplant donors
	GSM3103996	Normal	Glomeruli	living transplant donors
	GSM3103997	Normal	Glomeruli	living transplant donors
	GSM3103998	Normal	Glomeruli	living transplant donors
	GSM3103999	Normal	Glomeruli	living transplant donors
	GSM3103966	LN	Glomeruli	SLE patient
	GSM3103967	LN	Glomeruli	SLE patient
	GSM3103968	LN	Glomeruli	SLE patient
	GSM3103969	LN	Glomeruli	SLE patient
	GSM3103970	LN	Glomeruli	SLE patient
	GSM3103971	LN	Glomeruli	SLE patient
	GSM3103972	LN	Glomeruli	SLE patient
	GSM3103973	LN	Glomeruli	SLE patient
	GSM3103974	LN	Glomeruli	SLE patient
	GSM3103975	LN	Glomeruli	SLE patient
	GSM3103976	LN	Glomeruli	SLE patient
	GSM3103977	LN	Glomeruli	SLE patient
	GSM3103978	LN	Glomeruli	SLE patient
	GSM3103979	LN	Glomeruli	SLE patient
	GSM3103980	LN	Glomeruli	SLE patient
	GSM3103981	LN	Glomeruli	SLE patient
	GSM3103982	LN	Glomeruli	SLE patient
	GSM3103983	LN	Glomeruli	SLE patient
	GSM3103984	LN	Glomeruli	SLE patient
	GSM3103985	LN	Glomeruli	SLE patient
	GSM3103986	LN	Glomeruli	SLE patient
	GSM3103987	LN	Glomeruli	SLE patient
	GSM3103988	LN	Glomeruli	SLE patient
	GSM3103989	LN	Glomeruli	SLE patient
	GSM3103990	LN	Glomeruli	SLE patient
	GSM3103991	LN	Glomeruli	SLE patient
	GSM3103992	LN	Glomeruli	SLE patient
	GSM3103993	LN	Glomeruli	SLE patient
GSE32591	GSM807921	Normal	Glomeruli	living transplant donors
	GSM807922	Normal	Glomeruli	living transplant donors
	GSM807923	Normal	Glomeruli	living transplant donors
	GSM807924	Normal	Glomeruli	living transplant donors
	GSM807925	Normal	Glomeruli	living transplant donors
	GSM807926	Normal	Glomeruli	living transplant donors
	GSM807927	Normal	Glomeruli	living transplant donors
	GSM807928	Normal	Glomeruli	living transplant donors
	GSM807929	Normal	Glomeruli	living transplant donors
	GSM807930	Normal	Glomeruli	living transplant donors
	GSM807931	Normal	Glomeruli	living transplant donors
	GSM807932	Normal	Glomeruli	living transplant donors
	GSM807933	Normal	Glomeruli	living transplant donors
	GSM807934	Normal	Glomeruli	living transplant donors
	GSM807889	LN	Glomeruli	SLE patient
	GSM807890	LN	Glomeruli	SLE patient
	GSM807891	LN	Glomeruli	SLE patient
	GSM807892	LN	Glomeruli	SLE patient
	GSM807893	LN	Glomeruli	SLE patient
	GSM807894	LN	Glomeruli	SLE patient
	GSM807895	LN	Glomeruli	SLE patient
	GSM807896	LN	Glomeruli	SLE patient
	GSM807897	LN	Glomeruli	SLE patient
	GSM807898	LN	Glomeruli	SLE patient
	GSM807899	LN	Glomeruli	SLE patient
	GSM807900	LN	Glomeruli	SLE patient
	GSM807901	LN	Glomeruli	SLE patient
	GSM807902	LN	Glomeruli	SLE patient
	GSM807903	LN	Glomeruli	SLE patient
	GSM807904	LN	Glomeruli	SLE patient
	GSM807905	LN	Glomeruli	SLE patient
	GSM807906	LN	Glomeruli	SLE patient
	GSM807907	LN	Glomeruli	SLE patient
	GSM807908	LN	Glomeruli	SLE patient
	GSM807909	LN	Glomeruli	SLE patient
	GSM807910	LN	Glomeruli	SLE patient
	GSM807911	LN	Glomeruli	SLE patient
	GSM807912	LN	Glomeruli	SLE patient
	GSM807913	LN	Glomeruli	SLE patient
	GSM807914	LN	Glomeruli	SLE patient
	GSM807915	LN	Glomeruli	SLE patient
	GSM807916	LN	Glomeruli	SLE patient
	GSM807917	LN	Glomeruli	SLE patient
	GSM807918	LN	Glomeruli	SLE patient
	GSM807919	LN	Glomeruli	SLE patient
	GSM807920	LN	Glomeruli	SLE patient
GSE99339	GSM2642305	Normal	Glomeruli	Tumor Nephrectomy
	GSM2642306	Normal	Glomeruli	Tumor Nephrectomy
	GSM2642307	Normal	Glomeruli	Tumor Nephrectomy
	GSM2642330	Normal	Glomeruli	Tumor Nephrectomy
	GSM2642331	Normal	Glomeruli	Tumor Nephrectomy
	GSM2642332	Normal	Glomeruli	Tumor Nephrectomy
	GSM2642333	Normal	Glomeruli	Tumor Nephrectomy
	GSM2642334	Normal	Glomeruli	Tumor Nephrectomy
	GSM2642394	LN	Glomeruli	SLE patient
	GSM2642395	LN	Glomeruli	SLE patient
	GSM2642396	LN	Glomeruli	SLE patient
	GSM2642397	LN	Glomeruli	SLE patient
	GSM2642398	LN	Glomeruli	SLE patient
	GSM2642399	LN	Glomeruli	SLE patient
	GSM2642400	LN	Glomeruli	SLE patient
	GSM2642401	LN	Glomeruli	SLE patient
	GSM2642402	LN	Glomeruli	SLE patient
	GSM2642403	LN	Glomeruli	SLE patient
	GSM2642404	LN	Glomeruli	SLE patient
	GSM2642405	LN	Glomeruli	SLE patient
	GSM2642406	LN	Glomeruli	SLE patient
	GSM2642407	LN	Glomeruli	SLE patient
	GSM2642408	LN	Glomeruli	SLE patient
	GSM2642409	LN	Glomeruli	SLE patient
	GSM2642410	LN	Glomeruli	SLE patient
	GSM2642411	LN	Glomeruli	SLE patient
	GSM2642412	LN	Glomeruli	SLE patient
	GSM2642413	LN	Glomeruli	SLE patient
	GSM2642414	LN	Glomeruli	SLE patient
	GSM2642415	LN	Glomeruli	SLE patient
	GSM2642416	LN	Glomeruli	SLE patient
	GSM2642417	LN	Glomeruli	SLE patient
	GSM2642418	LN	Glomeruli	SLE patient
	GSM2642419	LN	Glomeruli	SLE patient
	GSM2642420	LN	Glomeruli	SLE patient
	GSM2642421	LN	Glomeruli	SLE patient
	GSM2642422	LN	Glomeruli	SLE patient
	GSM2642423	LN	Glomeruli	SLE patient
