# Supplementary material for: CD36 identified by weighted gene co-expression network analysis as a hub candidate gene in lupus nephritis
Source: PeerJ. 2019 Oct 1;7:e7722. doi: 10.7717/peerj.7722 (PMC6777479; doi:10.7717/peerj.7722)
Supplement: Table S2 [file peerj-07-7722-s002.xlsx]

## Sheet: DEGs in top LN module
DEGs in top LN module
	logFC	P.Value	FDR
C1QB	3.29902	2.18e-15	3.93e-13
C1QA	3.18304	3.28e-16	1.18e-13
FCN1	2.86204	1.18e-14	1.13e-12
LYZ	2.61929	1.68e-12	5.43e-11
TYROBP	2.60442	2.68e-15	4.29e-13
NCF2	2.56774	1.11e-13	5.83e-12
MS4A4A	2.43212	2.22e-13	9.83e-12
ISG15	2.36176	1.47e-12	4.86e-11
HCK	2.3487	3.81e-16	1.22e-13
LAPTM5	2.31967	1.37e-15	2.81e-13
CD36	2.29801	1.11e-09	1.14e-08
IL10RA	2.28437	6.75e-15	6.94e-13
CD53	2.20564	1.19e-16	5.7e-14
ITGB2	2.15672	1.14e-14	1.13e-12
CD163	2.13023	1.91e-09	1.8e-08
CYBB	2.12918	1.54e-14	1.38e-12
FCER1G	2.10612	9.11e-16	2.19e-13
CD48	2.06749	1.32e-15	2.81e-13
IFI30	2.05732	1.77e-16	7.29e-14
CD52	2.05701	1.33e-11	3.06e-10
APOBEC3A	2.0315	5.07e-10	6.14e-09
CX3CR1	2.01036	4.48e-09	3.65e-08
VSIG4	2.00917	5.35e-09	4.26e-08
C3AR1	2.00791	3.25e-15	4.93e-13
MS4A6A	1.98982	1.88e-14	1.55e-12
CSTA	1.95271	1.06e-13	5.63e-12
CCL4	1.94981	1.99e-11	4.32e-10
PTX3	1.94776	2.92e-07	1.29e-06
COL6A3	1.94467	2.02e-07	9.38e-07
MNDA	1.92169	9.23e-09	6.78e-08
MARCO	1.91393	2.24e-08	1.42e-07
TLR2	1.91298	1.07e-11	2.6e-10
PLAC8	1.91229	1.12e-10	1.77e-09
CD14	1.88423	8.13e-14	4.88e-12
CFD	1.86747	6.62e-14	4.14e-12
CTSS	1.85086	6.43e-14	4.11e-12
EVI2B	1.78529	4.36e-10	5.39e-09
ISG20	1.78147	6.67e-15	6.94e-13
CSF1R	1.77168	2.52e-13	1.07e-11
PHLDA2	1.73932	1.56e-09	1.54e-08
PYCARD	1.72999	4.77e-15	6.4e-13
RNASE6	1.71293	2.98e-09	2.6e-08
IFI44	1.70905	2.01e-12	6.45e-11
CCR1	1.70746	4.24e-11	7.73e-10
IFI35	1.69426	2.58e-17	1.49e-14
ADGRE5	1.68296	5.64e-18	4.06e-15
CD300A	1.67754	9.06e-14	5.33e-12
COL1A2	1.67749	1.31e-06	4.79e-06
EVI2A	1.659	2.7e-09	2.38e-08
HCLS1	1.64602	2.11e-15	3.93e-13
IRF7	1.63942	3.49e-13	1.42e-11
LY96	1.63786	2.15e-11	4.56e-10
IGSF6	1.62321	1.34e-09	1.34e-08
HTR2B	1.61578	1.54e-06	5.48e-06
POSTN	1.61462	1.36e-10	2.07e-09
MX2	1.61031	1.49e-10	2.21e-09
NETO2	1.60961	2.44e-08	1.52e-07
TNFRSF1B	1.60248	2.98e-13	1.23e-11
TLR1	1.5866	7.62e-11	1.25e-09
PLK2	1.56251	3.76e-11	7.16e-10
CORO1A	1.54902	2.5e-13	1.07e-11
MX1	1.54703	1.37e-08	9.39e-08
IGFBP6	1.5453	1.6e-09	1.56e-08
FPR3	1.53507	1.63e-08	1.09e-07
LST1	1.53334	7.51e-14	4.6e-12
IFI6	1.52089	4.01e-07	1.71e-06
S100A8	1.50927	9.08e-05	0.000188963
RAC2	1.48551	1.51e-12	4.93e-11
LCP1	1.48472	3.87e-11	7.24e-10
PTPRC	1.46371	6.05e-12	1.58e-10
UCP2	1.4597	1.24e-11	2.91e-10
FN1	1.45797	7.29e-08	3.9e-07
AOAH	1.4577	2.78e-12	8.34e-11
APOC1	1.45182	2.94e-06	9.58e-06
HLX	1.4435	3.49e-11	6.83e-10
ADGRE2	1.4417	1.56e-07	7.57e-07
GPR65	1.43962	2e-11	4.32e-10
CEBPA	1.43785	3.26e-14	2.47e-12
FABP4	1.43528	2.7e-06	8.94e-06
LYN	1.43095	1.34e-10	2.05e-09
MYO1F	1.42533	1.21e-09	1.24e-08
LILRB2	1.41638	9.21e-09	6.78e-08
DOCK2	1.41214	6.1e-12	1.58e-10
OAS2	1.40873	3.7e-10	4.71e-09
GBP1	1.40586	1.17e-08	8.16e-08
HERC6	1.40559	1.11e-08	7.8e-08
GBP2	1.38713	3.5e-14	2.59e-12
OAS1	1.38427	9.27e-09	6.79e-08
BCL2A1	1.37942	1.57e-06	5.57e-06
PSMB10	1.37281	3.54e-19	5.09e-16
HHEX	1.3719	2.47e-09	2.22e-08
PLA2G7	1.37043	2.85e-06	9.32e-06
CXCR4	1.36855	6.87e-07	2.71e-06
TCIRG1	1.36449	5.84e-15	6.75e-13
GZMA	1.36192	2.29e-08	1.44e-07
PXDN	1.35711	1.47e-10	2.21e-09
PFN1	1.3468	2.01e-11	4.33e-10
HK3	1.33845	7.28e-11	1.21e-09
VNN2	1.33264	3.78e-09	3.2e-08
SRPX	1.33083	7.55e-07	2.95e-06
ITGAM	1.3238	4.2e-09	3.47e-08
CFB	1.30203	8.31e-09	6.22e-08
ADA	1.29943	2.72e-13	1.14e-11
CASP1	1.29621	2.07e-13	9.48e-12
AEBP1	1.2921	2.17e-09	2e-08
IDO1	1.28791	0.000224255	0.000420898
FXYD5	1.28619	1.69e-14	1.43e-12
IFITM1	1.28117	4.71e-12	1.29e-10
RHOC	1.27905	2.31e-19	5.09e-16
LTF	1.27801	9.29e-07	3.53e-06
FGR	1.26577	2.53e-10	3.46e-09
PARP12	1.25559	1.37e-13	7.04e-12
PTGER2	1.25279	2.06e-10	2.94e-09
S100A4	1.24348	5.69e-12	1.5e-10
TGFBI	1.24318	3.63e-10	4.65e-09
ADAMTS1	1.23441	2.4e-08	1.5e-07
IFIT3	1.22992	3.63e-08	2.12e-07
PCDH12	1.2242	2.82e-14	2.19e-12
SAMSN1	1.21463	5.18e-05	0.000116283
TNC	1.21078	6.89e-08	3.72e-07
OAS3	1.20954	7.42e-07	2.91e-06
MICB	1.20895	1.87e-11	4.15e-10
CALHM2	1.20782	7.42e-16	1.94e-13
SLA	1.20706	1.76e-11	3.92e-10
APOBEC3B	1.20463	0.000801962	0.00130093
SLC15A3	1.20252	1.04e-13	5.63e-12
UPP1	1.20075	1.1e-12	3.81e-11
AGTR1	1.19832	2.65e-08	1.61e-07
IFI44L	1.19111	0.000106311	0.000216608
FCGR3B	1.1785	0.00047771	0.00082511
AQP9	1.17651	0.000194768	0.000371606
EMP3	1.17639	9.94e-13	3.54e-11
RSAD2	1.17506	4.52e-05	0.000103542
CRIP1	1.17254	8.27e-10	9.2e-09
IFIH1	1.1679	1.08e-09	1.13e-08
SOD2	1.16116	8.15e-08	4.31e-07
SLC27A3	1.15839	6.09e-16	1.75e-13
CFP	1.15411	1.1e-10	1.76e-09
ICAM2	1.15016	1.68e-13	8.22e-12
CXCL10	1.14932	0.00390749	0.00539928
C3	1.149	0.000254469	0.000470858
LAIR1	1.14287	2.47e-09	2.22e-08
LPAR6	1.13602	1.22e-09	1.25e-08
P2RY13	1.13254	7.69e-07	3e-06
PLEK	1.13004	4.11e-08	2.37e-07
S100A9	1.12923	6.51e-06	1.89e-05
CCRL2	1.12915	1.52e-11	3.48e-10
CD68	1.12573	6.34e-07	2.52e-06
COTL1	1.11803	5.81e-07	2.36e-06
RASSF2	1.11683	2.35e-08	1.48e-07
NMI	1.11264	5.31e-12	1.44e-10
PPP1CA	1.10971	4.57e-13	1.8e-11
C5AR1	1.10957	1.89e-05	4.85e-05
PTPN6	1.09681	6.54e-13	2.51e-11
ADAP2	1.09605	8.2e-11	1.33e-09
ID1	1.09325	1.74e-09	1.66e-08
CYTIP	1.09261	1.38e-06	5.01e-06
HPSE	1.09201	4.23e-07	1.79e-06
LY86	1.09179	2.35e-13	1.03e-11
NKG7	1.08768	1.72e-07	8.21e-07
SYT11	1.08598	2.16e-12	6.76e-11
CHRDL1	1.08298	1.04e-07	5.31e-07
SCO2	1.07881	4.18e-14	2.91e-12
IFI16	1.07794	1.42e-12	4.76e-11
MAN2B1	1.0764	8.77e-13	3.18e-11
GZMH	1.0755	6.79e-06	1.96e-05
FGL2	1.07457	1.01e-13	5.61e-12
IER5	1.07356	4.16e-11	7.64e-10
ARPC1B	1.07057	4.48e-11	8.01e-10
FAM129A	1.06287	1.11e-08	7.8e-08
TNFAIP8	1.06144	3.37e-10	4.38e-09
IRF1	1.05912	8.18e-13	3.02e-11
DOCK10	1.05805	6.03e-08	3.29e-07
GZMB	1.05628	1.42e-05	3.8e-05
COL4A1	1.05598	5.44e-10	6.53e-09
SNAI2	1.05498	3.61e-11	6.99e-10
HMOX1	1.05444	1.15e-07	5.82e-07
THEMIS2	1.05207	2.31e-08	1.45e-07
ACTA2	1.05094	2.15e-05	5.43e-05
LHFPL2	1.04523	2.42e-07	1.1e-06
SERPINH1	1.04324	2.6e-10	3.51e-09
CD248	1.04025	4.6e-11	8.19e-10
GLIPR1	1.03638	5.41e-09	4.29e-08
CD44	1.03063	7.93e-10	8.89e-09
FAM49A	1.03046	5.47e-10	6.54e-09
SH3BGRL3	1.0302	2.37e-12	7.28e-11
MICALL2	1.02814	2.04e-10	2.92e-09
PTPRE	1.02611	4.26e-09	3.51e-08
TFPI2	1.02113	6.91e-05	0.000148603
PGF	1.00587	1.34e-07	6.58e-07
DDX58	1.00492	1.37e-06	4.96e-06
TYMP	1.00382	2.06e-08	1.33e-07
HERC5	1.00185	4.98e-07	2.05e-06
XAF1	1.00067	2.59e-06	8.63e-06
CPVL	1.00062	4.34e-07	1.83e-06
SLC19A2	-1.02018	1.63e-11	3.67e-10
UGT2A3	-1.08793	1.91e-07	8.95e-07
CYP4A11	-1.24334	5.07e-11	8.9e-10
IGF1	-1.37364	4e-06	1.25e-05
NELL1	-1.44865	0.00357185	0.00499054
G6PC	-1.50766	8.61e-10	9.43e-09
FOSB	-1.76934	1.42e-05	3.8e-05
CYP27B1	-1.89561	2.46e-08	1.52e-07

## Sheet: DEGs in top non-LN module
DEGs in top non-LN module
	logFC	P.Value	FDR
SLC22A8	-1.46267	6.48995e-12	4.20763e-09
HRG	-1.08134	1.0936e-09	1.69946e-07
CLDN8	-2.19003	7.80261e-09	5.45576e-07
APOH	-1.29051	8.27517e-09	5.45576e-07
KL	-1.0924	8.42589e-09	5.45576e-07
XPNPEP2	-1.63186	1.27772e-08	6.61859e-07
SLC12A3	-1.04165	2.15333e-08	1.00843e-06
SERPINA6	-1.16123	3.23329e-08	1.36995e-06
PPARGC1A	-1.08888	4.65727e-08	1.70866e-06
EGF	-1.50337	5.81846e-08	1.96563e-06
RHCG	-1.71519	6.72204e-08	2.14817e-06
GIPC2	-1.04906	7.41684e-08	2.14817e-06
KCNK5	-1.04284	7.46468e-08	2.14817e-06
SLC34A1	-1.06673	8.59884e-08	2.3039e-06
MGAM	-1.53141	1.01143e-07	2.6196e-06
SLC5A12	-1.25669	1.14351e-07	2.85592e-06
DEFB1	-2.37003	1.17618e-07	2.85592e-06
PCK1	-2.11607	1.23403e-07	2.88464e-06
KNG1	-1.23847	1.26226e-07	2.88464e-06
RALYL	-1.03148	1.3479e-07	2.99233e-06
HSD11B2	-2.0064	2.1804e-07	4.34403e-06
SLC13A3	-1.38686	2.63918e-07	4.94441e-06
RNF186	-1.09502	3.36005e-07	5.80168e-06
CALB1	-2.87031	3.54363e-07	5.8583e-06
AFM	-1.12831	4.77201e-07	7.56704e-06
GBA3	-1.22476	5.58724e-07	8.34862e-06
LRRC19	-1.16642	1.26116e-06	1.48472e-05
HAO2	-1.39017	1.34013e-06	1.55416e-05
HPN	-1.01998	1.9043e-06	1.9469e-05
HMGCS2	-1.25774	2.35019e-06	2.28263e-05
EPCAM	-1.37638	2.87272e-06	2.72208e-05
PLG	-1.71447	3.67848e-06	3.23944e-05
GLYAT	-1.27887	4.69607e-06	3.95142e-05
RIDA	-1.08615	4.7295e-06	3.95142e-05
CYP4F2	-1.23966	5.47848e-06	4.29978e-05
DPYS	-1.58127	6.62233e-06	4.99568e-05
GSTA1	-1.64829	7.07435e-06	5.20397e-05
ALB	-2.07572	7.07589e-06	5.20397e-05
ALDH6A1	-1.01495	8.78349e-06	6.26126e-05
DIO1	-1.65271	9.40171e-06	6.52243e-05
ATP6V0A4	-1.32151	1.01877e-05	6.93922e-05
KLK1	-1.42206	1.16494e-05	7.48063e-05
PBLD	-1.0476	1.35312e-05	8.08402e-05
UPB1	-1.08813	1.39405e-05	8.09666e-05
GATM	-1.28692	1.44065e-05	8.23075e-05
KCNJ1	-1.28026	1.55915e-05	8.7787e-05
SLC17A1	-1.17865	1.67835e-05	9.38185e-05
PAH	-1.4417	1.89874e-05	0.000101746
AOC1	-1.81182	2.35148e-05	0.000117201
CRYM	-1.09744	2.96581e-05	0.000141376
SLC27A2	-1.30461	3.61426e-05	0.000170199
ALDOB	-1.30317	3.98075e-05	0.000181944
SLC13A1	-1.10351	4.01946e-05	0.000182638
ACE2	-1.07559	5.02204e-05	0.000215587
CUBN	-1.31489	6.04149e-05	0.000245772
FABP1	-1.18586	7.29185e-05	0.000287602
BHMT2	-1.01018	8.46619e-05	0.000327275
SPINK1	-1.02683	8.87772e-05	0.000336487
SLC12A1	-1.45653	9.45243e-05	0.000353103
AZGP1	-1.42166	0.000112614	0.000399547
SLC3A1	-1.19266	0.00012084	0.000422941
BBOX1	-1.46491	0.00012754	0.000438489
FMO1	-1.21052	0.000138268	0.000471203
SERPINA5	-1.51429	0.000186362	0.000608667
HPD	-1.38247	0.000186439	0.000608667
RBP4	-1.24589	0.000189278	0.000610244
SLC7A9	-1.28265	0.000195211	0.000617108
DPEP1	-1.02903	0.00025439	0.000766414
AGMAT	-1.31181	0.000256905	0.000770618
APOM	-1.07635	0.000291451	0.000854556
SLC47A1	-1.17225	0.000369836	0.00102997
SLC22A6	-1.04314	0.00044294	0.00118677
BHMT	-1.06488	0.000555024	0.00143274
CXCL14	-1.24816	0.000598463	0.00152461
ALDH8A1	-1.03599	0.000702613	0.00173863
MAL	-1.01985	0.000985914	0.0023074
SLC17A3	-1.14703	0.00158178	0.00337648
UMOD	-1.62246	0.00202966	0.00415012
